# Supplementary material for: The SWI/SNF protein ATRX co-regulates pseudoautosomal genes that have translocated to autosomes in the mouse genome
Source: PubMed Central journal article supplement (PMC2577121; doi:10.1186/1471-2164-9-468), 2008-10-08

**A**

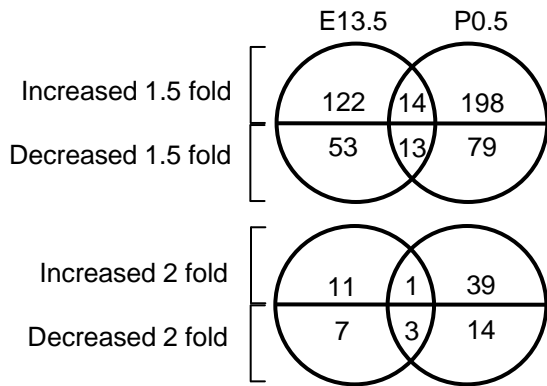

**B**

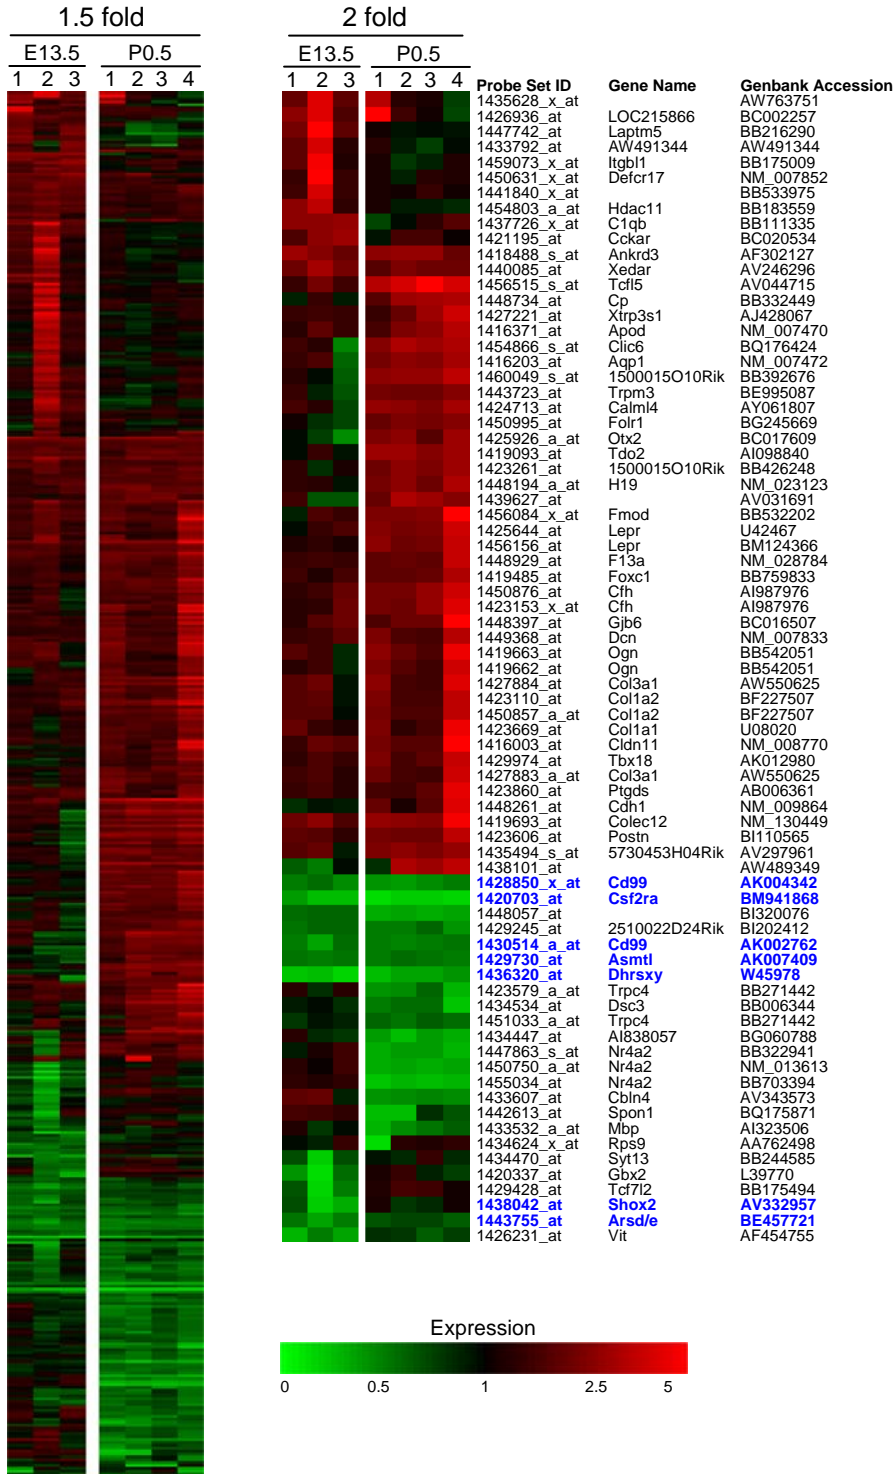

Supplement: 1471-2164-9-468-S1.pdf [file 1471-2164-9-468-S1.pdf]
