# Supplementary material for: The SWI/SNF protein ATRX co-regulates pseudoautosomal genes that have translocated to autosomes in the mouse genome
Source: PubMed Central journal article supplement (PMC2577121; doi:10.1186/1471-2164-9-468), 2008-10-08
Supplement: 1471-2164-9-468-S3.pdf [file 1471-2164-9-468-S3.pdf]

|      |             |     |                                                         |                   |                            |      |
|------|-------------|-----|---------------------------------------------------------|-------------------|----------------------------|------|
| ARSE | Chicken     | 428 | LLQGTVOHSEHEFMFH                                        | YCGVVLHAVRWHQKDR  | GTIWKAHYATPLFKPEDSGACFE    | ---- |
|      | Cow         | 438 | LLQGTARHSDHEFLMH                                        | YCESFLHAARWHQORD  | ----LWKVHFITTPIFQPDGAGACYG | ---- |
|      | Dog         | 437 | LLGTAQHSDHEFLH                                          | YCEFLHAARWHQORDG  | GRLLWKVHYMTPLFHPEGAGACYG   | ---- |
|      | Horse       | 435 | LRGTARHSDHEFLH                                          | YCGKFLHAARWHQORDR | CAVWKVHYVTPVFHFDGAGACYG    | ---- |
|      | Macaque     | 441 | LLGTAQHSDHEFLMH                                         | YCEGFLHAARWHQORDR | TTWKVHFVTPVFQPEGAGACYG     | ---- |
|      | Human       | 441 | LLGTAQHSDHEFLMH                                         | YCEFLHAARWHQORDR  | CTMWKVHFVTPVFQPEGAGACYG    | ---- |
|      | Platypus    | 461 | LQGTQQRSDHEFLFH                                         | YCELYLHAVRWHHRES  | CAVWKVHYVTPVFHFKGAGACYG    | ---- |
|      | Opossum     | 435 | LWGEIDQSDHEFMFH                                         | YCESYLHAVRWHQKDS  | CTVWKVHYVTPVFHPEGAGACYG    | ---- |
|      | Puffer Fish | 504 | LECKVERSEHEFMFH                                         | YCGLYLHAVRWHPPGS  | DSVFKVHFITPNEFPPGAGGCYN    | ---- |
|      | Rat         | 443 | LRGETWHSAAHEVLLH                                        | YCEVELHAVRWHVQDS  | GQVWKAHFVTPTFDPLGSGSCSGAGG | ---- |
| ARSD | Mouse       | 1   | LRGEABHAAHEVLLH                                         | YCEVELHAARLVQER   | GKVKVHFVTPTFDPPGSGSCAGPDGG | ---- |
|      | Dog         | 489 | LRGAABHSAHEFLFH                                         | YCGKYLHAARWHEKDS  | GRLLWKVHYMTPRFHFKGAGACYG   | ---- |
|      | Horse       | 679 | LQGAABHSEHEFLFH                                         | YCGKHLHAARWHDKDS  | GRLLWKVHYMTPRFHPEGAGACYG   | ---- |
|      | Human       | 442 | LQGAEARSAHEFLFH                                         | YCGQLHAARWHQKDS   | GSVWKVHYTTPVFHPEERGLLTA    | ---- |
|      | Macaque     | 273 | LQGAEARSAHEFLFH                                         | YCGQLHAARWHQDS    | GSVWKVHYTTPVFHPEGAGACYG    | ---- |
|      | Opossum     | 399 | LQGTVBHSHKHFLLH                                         | YCGIHLHAARWHQKDS  | NKIWKVHYITPNEFHEPGAGACYG   | ---- |
|      | Platypus    | 515 | -----HNEFRYLLSAYCLRSTELSTWERRERGEAVWKAHYVTPVFQPDGAGACYG |                   |                            |      |
|      | Chicken     | 390 | LQGRTOKSEHKFLFH                                         | YCGSYLHAVRWHQKDS  | CAVWKAHYVTPNEFHLGAGACYG    | ---- |
|      | Zebrafish   | 333 | LEGSSRSQHHEFMFH                                         | YCGMYLNAVRRWHQNS  | SSIYKVVVFSPVHSPAGSSGCFSS   | ---- |

|      |             |     |                       |                      |                    |
|------|-------------|-----|-----------------------|----------------------|--------------------|
| ARSE | Chicken     | 482 | -----RCICPCFCG        | GVTHHDPPLLFDLSDPSE   |                    |
|      | Cow         | 489 | -----QIVCPCSENRVTHH   | APPLLFDLSDPSE        |                    |
|      | Dog         | 491 | -----RGVPCPCG         | QVAHDPPLLFDLSDPSE    |                    |
|      | Horse       | 489 | -----KAVCPCSC         | HGVSRHDPPLLFDLSDPSE  |                    |
|      | Macaque     | 494 | -----RKVCPCFC         | GKVLHDPPLLFDLSDPSE   |                    |
|      | Human       | 494 | -----RKVCPCFC         | GKVVHDPPLLFDLSDPSE   |                    |
|      | Platypus    | 515 | -----RLVCPCFC         | DRVTHHDPPLLFDLSSDPSE |                    |
|      | Opossum     | 489 | -----RGVPCPCFC        | GVIIHDPPLLFDLSDPSE   |                    |
|      | Puffer Fish | 558 | -----TRITCQCF         | GKHVSHDPPLVFDLFRDPSE |                    |
|      | Rat         | 500 | -----AAAVCPCVCK       | VEEHDPPLLFELTSDPGE   |                    |
| ARSD | Mouse       | 59  | SGGGNDAEAGQEAGAAPQARL | CPCVFG               | VTQHDPPLLYELTSDPGE |
|      | Dog         | 543 | -----RGVPCPCG         | GVTOHSPPLLFELSDPSE   |                    |
|      | Horse       | 733 | -----QGVPCPCSG        | GVTOHNPPLLFELSDPSE   |                    |
|      | Human       | 496 | -----EASAHAEWGGVTHHR  | PPPLLFDLSDPSE        |                    |
|      | Macaque     | 327 | -----RGVPCPCSG        | GVTHHRPPLLFDLSDPSE   |                    |
|      | Opossum     | 453 | -----RGVPCPCSG        | HHVTYHDQPLLFDLSDPSE  |                    |
|      | Platypus    | 565 | -----SRMCSCSC         | GAVRRHPPPLLFDLSDPSE  |                    |
|      | Chicken     | 444 | -----KGCPCFCG         | GVTHHDPPLLYDLSDPSE   |                    |
|      | Zebrafish   | 387 | -----TCSMCHKPHVTYH    | SPPLVFLTSSDPSE       |                    |
