# Supplementary material for: The SWI/SNF protein ATRX co-regulates pseudoautosomal genes that have translocated to autosomes in the mouse genome
Source: PubMed Central journal article supplement (PMC2577121; doi:10.1186/1471-2164-9-468), 2008-10-08
Supplement: 1471-2164-9-468-S5.pdf [file 1471-2164-9-468-S5.pdf]

Mouse 1 MSLTSLALSLSRFRVVLASASPRRQEILGLTGVALEVVPFRFPELTSKAAAPRPQDYARE  
 Human 1 MVLCPVIGKLLHKRVVLASASPRRQEILSNAGLRFEVVPSKFKEKLDKASFATPYGYAME  
 Orangutan 1 MVLCPVIGKLLHKRVVLASASPRRQEILSNAGLRFEVVPSKFKEKLDKASFATPYGYAME  
 Chimpanzee 1 MVLCPVIGKLLHKRVVLASASPRRQEILSNAGLRFEVVPSKFKEKLDKASFATPYGYAME  
 Cow 1 MLLCPVIGKLLHKRVVLASASPRRQEILSNAGLRFEVVPSRFKEKLDKASFATPYAYALE  
 Opossum 1 MVLCPVIRKLLHKRVVLASASPRRQEILSNAGLRFEVVPSRFKETLDKAAFSPTYEYALE  
 Frog 1 MLLNPIVSKLACKRVVLASASPRRQDILINVLGRFEVVPSSWFKETLDKSVFAAPYEYALE  
 Chicken 1 MVLSPIVGLKLVSKRVVLASASPRRQEILINVLGRFEVVPSSWFKETLEKSSFAAPYEYALE  
 Platypus 189 MALSPIVIGKLVKRVVLASASPRRQEILSNAGLRFEVVPSKFKEKLDKSLFEAPYEYALE

Mouse 61 TATGKAQEVAAARIVQEDPEPTIVIGADTVVAVDGRILEKPKDREDAALGDLRSLSGKQHQ  
 Human 61 TAKQKALEVANRIYQKDLRAPDVIIGADTIVTVGGLILEKPVDKQDAYRMLSRSLSGREHS  
 Orangutan 61 TAKQKALEVANRIYQKDLRAPDVIIGADTIVTVGGLILEKPVDKQDAYRMLSRSLSGREHS  
 Chimpanzee 61 TAKQKALEVANRMHQ-----TVGGLILEKPVDKQDAYRMLSRSLSGREHS  
 Cow 61 TAKQKALEVADRMVQKDLRAPDVIIGADTIVAVGGLILEKPVDKQDAYRMLSRSLSGKEHS  
 Opossum 61 TAKQKALEVANRMNKKDFRSPDVIIGADTIVSDGQILEKPADKQHAYSMLSRSLNGKEHS  
 Frog 61 TAKQKALEVARRMHMKHLKTPDIVIGADTIVTLEEAILEKPVDKQDAYNMLSRSLSGKEHS  
 Chicken 61 TAKQKALEVANRMHVKHLRTPDIVIGADTIVTVEQILEKPVDKQDAYRMLSRSLSGKEHS  
 Platypus 249 TAKQKALEVAHRLHRKDFRSPDVIIGADTIVAVEGLILEKPVDKQDAYNMLSRSLNGREHS

Mouse 121 VFTGVAIVTWG-GCEGPAQ-EVTAFFHEETSIVTFSPLESELIREYTDSGEGWDKAGAYA IQ  
 Human 121 VFTGVAIVHCS-SKDHQLDTRVSEFYEETKVKFSELSELLWEYVHSGEPMKAGGYGIQ  
 Orangutan 121 VFTGVAIVHCS-SKDHQLDTRVSEFYEETKVKFSELSELLWEYVHSGEPMKAGGYGIQ  
 Chimpanzee 105 VFTGVAIVHCS-SKDHQLDTRVSEFYEETKVKFSELSELLWEYVHSGEPMKAGGYGIQ  
 Cow 121 VFTGVAIVHCY-TKDGQLDTGVSEFYEETKVKFSELSELLWEYVHSGEPMKAGGYGIQ  
 Opossum 121 VFTGVAIVLCS-TKDKQLETEVFEFYEETKVKFSDLSELLWEYVHSGEPMKAGGYGIQ  
 Frog 121 VFTGVSIIVLCNRQKDNQLEMDVDFEYETKVKFADLSELLWEYVHSGEPMKAGGYGIQ  
 Chicken 121 VFTGVVLIHCS-SKDNQLETEITDFYEETKVKFSDLSELLWEYVHSGEPMKAGGYGIQ  
 Platypus 309 VFTGVAIVHCS-SKDKELTTEVSOEHEETTKVKFSELSELLWDYVHSGEPMKAGGYGIQ

Mouse 179 ARGAMLVQDVAGDVLNVAVGFPFLNRFCELRARV--PPT-----  
 Human 180 ALGGMLVESVHGDFLNVVGFPLNHFCQQLVKLYPPRPEDLRRSVKHDPIPAADTFEDLS  
 Orangutan 180 ALGGMLVESVHGDFLNVVGFPLNHFCQQLVKLYPPRPEDLRRSVKHDPIPAADTFEDLS  
 Chimpanzee 164 ALGGMLVESVHGDFLNVVGFPLNHFCQQLVKLYPPRPEDLRRSVKHDPIPAADTFEDLS  
 Cow 180 ALGGMLVEYVVGDFLNVVGFPLNRFCKELAHLYHGPRAGAPRQVHDSIPAVDTFEDLS  
 Opossum 180 SLGGMLVEYVHGDFLNVVGFPLNHFCQKLVLYPPPS-KDAIHHVKHDSVPSVETFEVLS  
 Frog 181 SLGGMLVESVHGDFLNVVGFPLNHFCQKLAELYPPPSKQTNR-LKHDSIPVETFEVLS  
 Chicken 180 ALGGMLVEYVHGDFLNVVGFPLNHFCQKLAELYCPPLKHTIQH-LKHDSIPVDTFESLS  
 Platypus 369 ALGGMLVESVHGDFLNVVGFPLNRFCKQLAALYPAPRL-----PAPPGGTPETLIG

Mouse 214 --RTGSEEV---TSQTTGIDSK-----DVKX  
 Human 240 DVEGGGSEP---TQRDAGSR--DEKA-----EA  
 Orangutan 240 DVEGGGSEP---TQRDAGSR--DEKA-----EA  
 Chimpanzee 224 DVEGGGSEP---AQRDAGSR--DEKA-----EA  
 Cow 240 DAEGGSDP---ARAKEGL---EPC-----CV  
 Opossum 239 DEESGSSNS---TQQNVTSMLKGE-SAFSCGDPGSLRKKEV  
 Frog 240 DVEKDCCVKREAPDVKKGSQ--EKCNV-ALRNK----SSN  
 Chicken 239 DGESESSSFKEHKGAIKLDS--PSGVI-CNSEN----SSG  
 Platypus 429 REDGPSLPP---L-----AS-----SD
